# Supplementary material for: Sensitive and selective urinary 1-hydroxypyrene detection by dinuclear terbium-sulfonylcalixarene complex
Source: Royal Society of Chemistry journal article supplement (doi:10.1039/c8dt01604f), 2018-01-01
Supplement: c8dt01604f1.pdf [file c8dt01604f1.pdf]

## Supporting Information

### **Sensitive and Selective Urinary 1-Hydroxypyrene Detection by Dinuclear Terbium-Sulfonylcalixarene Complex**

Cheng-Zhe Sun,<sup>a,b</sup> Li-Yi Zhang,<sup>a</sup> Jin-Yun Wang,<sup>a</sup> Zhong-Ning Chen,<sup>\*a</sup> Feng-Rong Dai<sup>\*a</sup>

<sup>a</sup> State Key Laboratory of Structural Chemistry, Fujian Institute of Research on the Structure of Matter, Chinese Academy of Sciences, Fuzhou, Fujian 350002, China

<sup>b</sup> University of Chinese Academy of Sciences, Beijing 100049, China

\* To whom correspondence should be addressed. E-mail: [dfir@fjirsm.ac.cn](mailto:dfir@fjirsm.ac.cn), Tel: (+86) 591-6317-3171

**Table S1.** Crystallographic Data for Compound **1**.

|                                                              | <b>1</b>                                                                                                       |
|--------------------------------------------------------------|----------------------------------------------------------------------------------------------------------------|
| Empirical formula                                            | C <sub>68</sub> H <sub>115</sub> Cl <sub>2</sub> N <sub>7</sub> O <sub>23</sub> S <sub>4</sub> Tb <sub>2</sub> |
| Formula weight                                               | 1915.64                                                                                                        |
| Temperature (K)                                              | 100(2)                                                                                                         |
| Wavelength                                                   | 0.71073                                                                                                        |
| Crystal system                                               | Triclinic                                                                                                      |
| space group                                                  | <i>P</i> -1                                                                                                    |
| <i>a</i> (Å)                                                 | 14.7653(7)                                                                                                     |
| <i>b</i> (Å)                                                 | 23.1399(10)                                                                                                    |
| <i>c</i> (Å)                                                 | 25.0656(11)                                                                                                    |
| $\alpha$ (°)                                                 | 88.199(2)                                                                                                      |
| $\beta$ (°)                                                  | 85.335(2)                                                                                                      |
| $\gamma$ (°)                                                 | 78.795(2)                                                                                                      |
| <i>V</i> (Å <sup>3</sup> )                                   | 8372.0(7)                                                                                                      |
| <i>Z</i>                                                     | 4                                                                                                              |
| D(calcd) (g cm <sup>-3</sup> )                               | 1.520                                                                                                          |
| $\mu$ (Mo <i>K</i> $\alpha$ ) (mm <sup>-1</sup> )            | 1.912                                                                                                          |
| <i>F</i> (000)                                               | 3936                                                                                                           |
| $\theta$ range (°)                                           | 2.058 - 25.717                                                                                                 |
| Limiting indices                                             | -18 $\leq$ h $\leq$ 18, -28 $\leq$ k $\leq$ 28, -30 $\leq$ l $\leq$ 30                                         |
| Reflections collected / unique                               | 290188 / 31705 [ <i>R</i> <sub>int</sub> = 0.0867]                                                             |
| Data / restraints / parameters                               | 31705 / 1074 / 2103                                                                                            |
| GOF                                                          | 1.075                                                                                                          |
| <i>R</i> <sub>1</sub> ( <i>I</i> > 2 $\sigma$ ( <i>I</i> ))  | 0.0602                                                                                                         |
| <i>wR</i> <sub>2</sub> ( <i>I</i> > 2 $\sigma$ ( <i>I</i> )) | 0.1327                                                                                                         |
| <i>R</i> <sub>1</sub> (all data)                             | 0.0978                                                                                                         |
| <i>wR</i> <sub>2</sub> (all data)                            | 0.1637                                                                                                         |
| $\Delta\rho$ / e Å <sup>-3</sup>                             | 2.549, -2.466                                                                                                  |

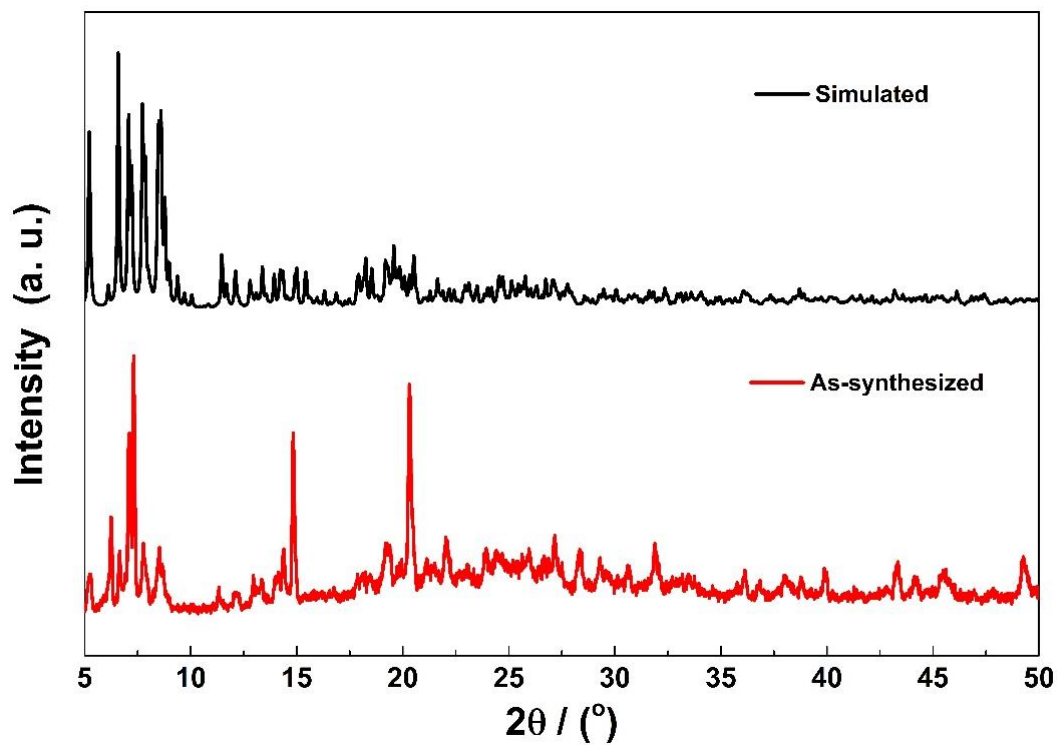

Fig. S1. Experimental PXRD pattern of **1** (bottom) in comparison with simulated pattern (top) calculated from single-crystal structure.

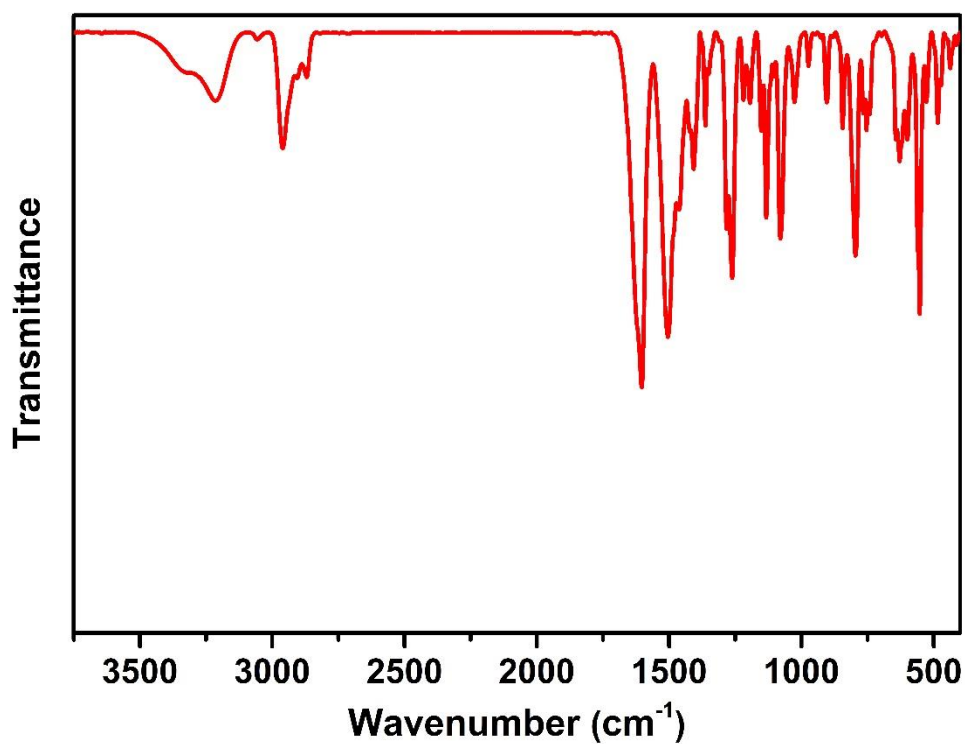

Fig. S2. FT-IR spectrum of as-synthesized sample of **1**.

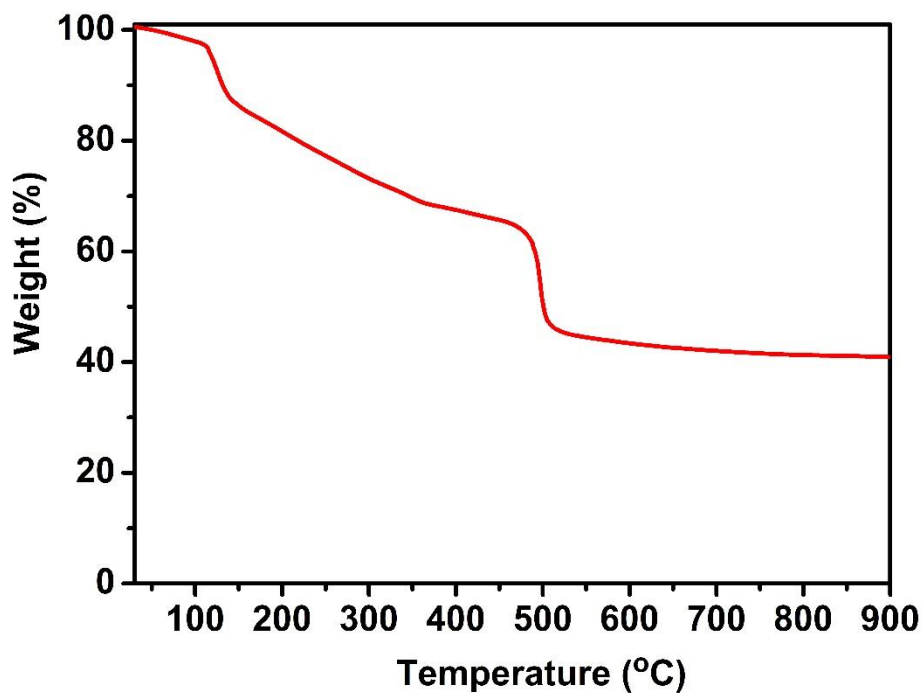

Fig. S3. TGA of as-synthesized sample of **1**.

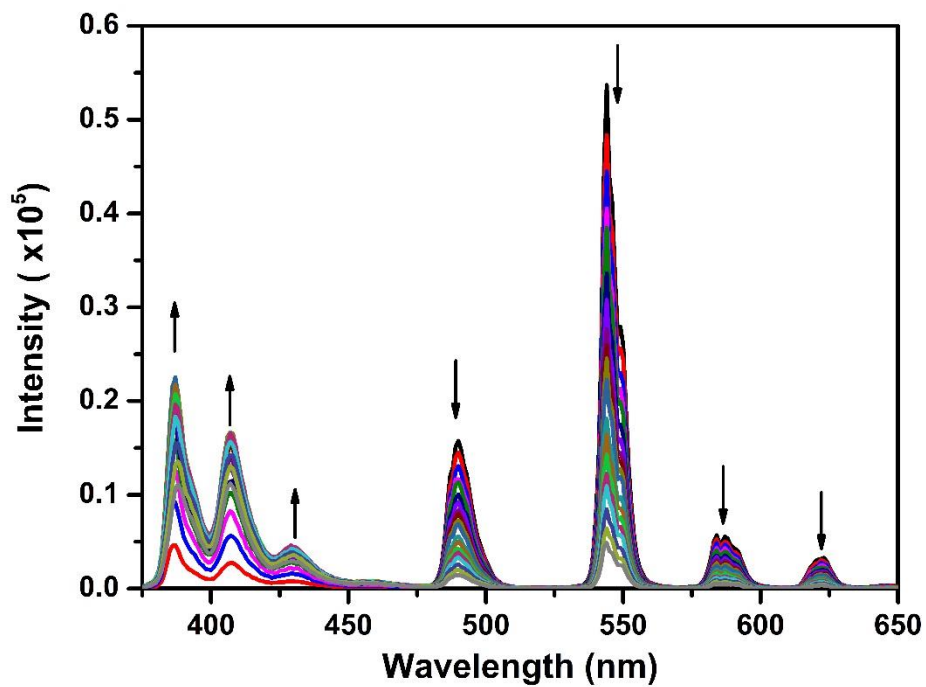

Fig. S4. Emission spectra of **1** ( $4.17 \times 10^{-6}$  M) in  $\text{CH}_3\text{CN}$  solution titrated with 1-OHP

( $\lambda_{\text{ex}} = 346$  nm), the arrow indicates the gradual increase of 1-OHP equivalents.

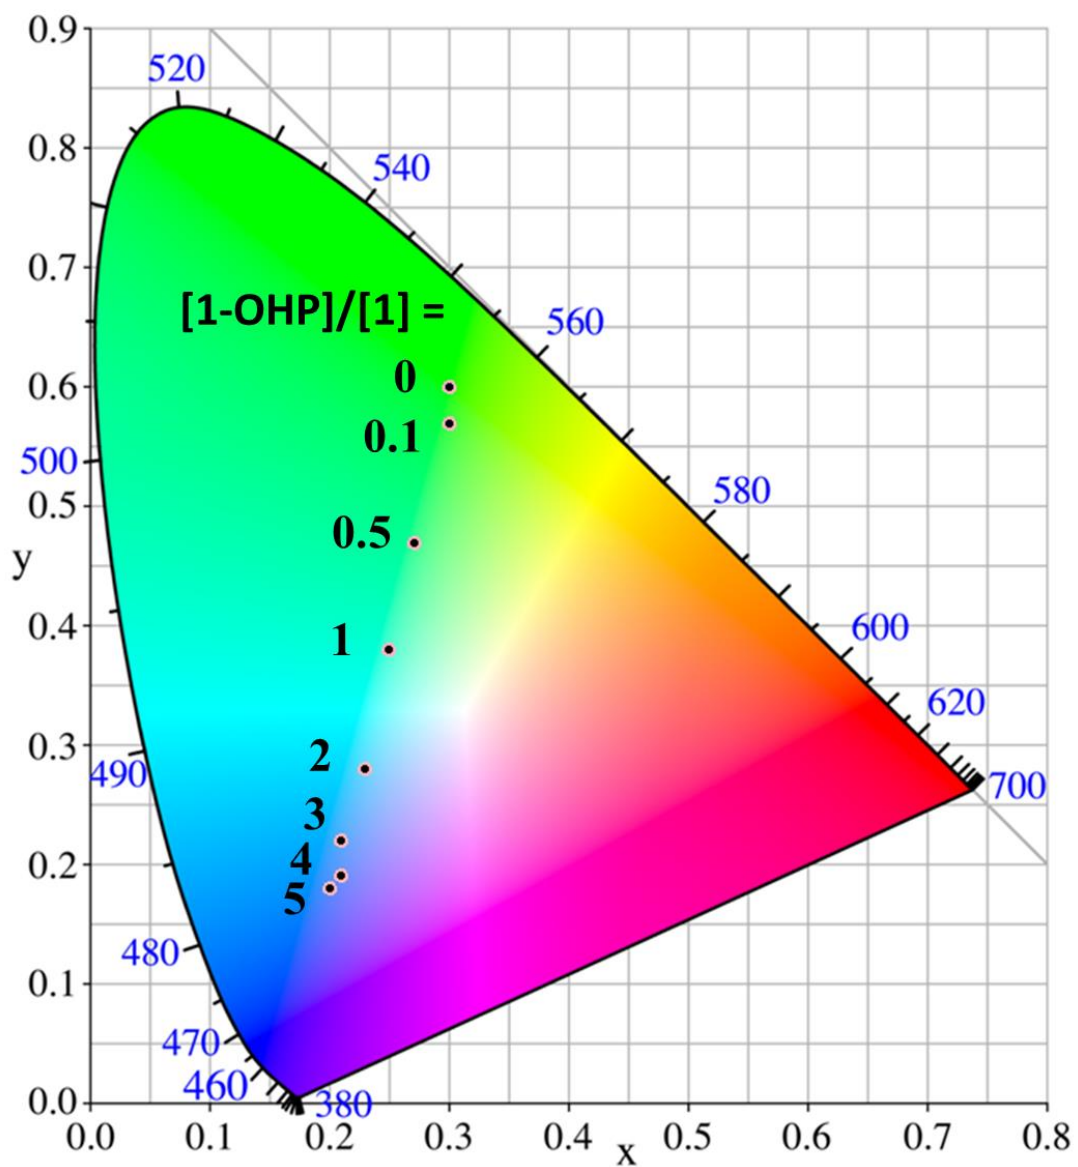

**Fig. S5.** The CIE chromaticity diagram with the chromaticity coordinates calculated from the emission spectra of compound **1** upon addition of 1-OHP.

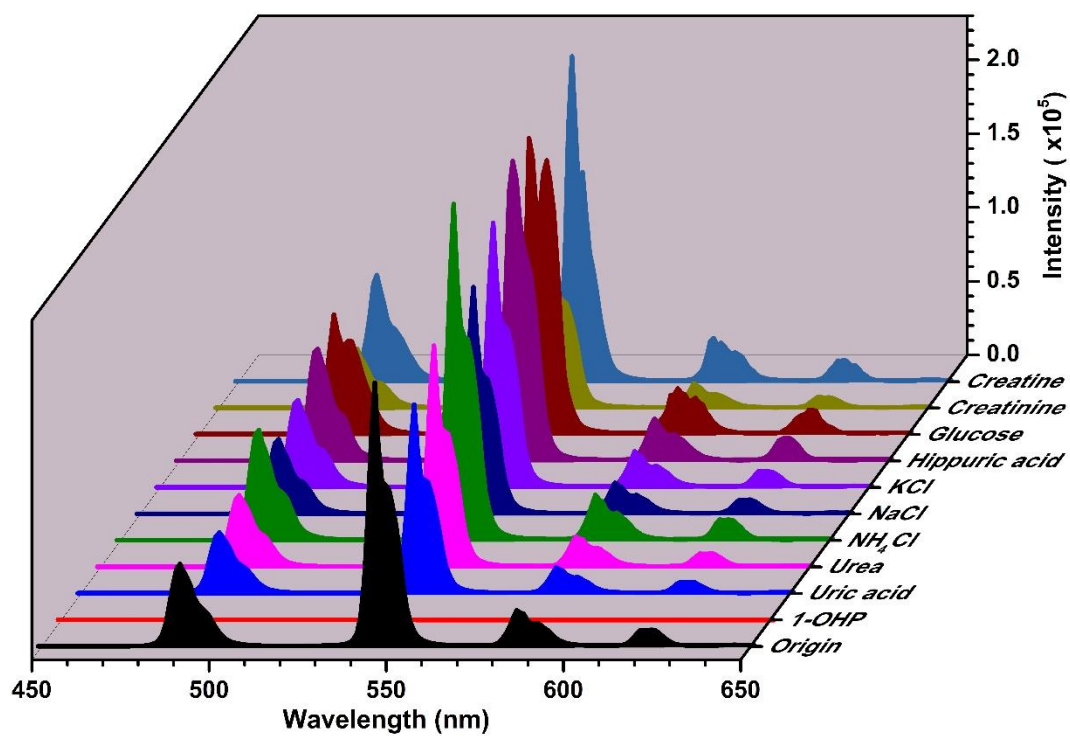

**Fig. S6.** Emission spectra of **1** with various urine constituents in the CH<sub>3</sub>CN/H<sub>2</sub>O (v:v = 4:1) solution ( $\lambda_{\text{ex}} = 346 \text{ nm}$ ), suggesting an excellent quenching effect of 1-OHP toward compound **1**.
